# Supplementary material for: The prognostic value of cardiopulmonary exercise testing in interstitial lung disease: a systematic review
Source: PubMed Central journal article supplement — ERJ Open Res. 2020 Aug 17;6(3):00027-2020. doi: 10.1183/23120541.00027-2020 (PMC7430148; doi:10.1183/23120541.00027-2020), 2020-08-17
Supplement: 00027-2020.SUPP2.pdf [file 00027-2020.SUPP2.pdf]

Supplementary material 2: The Quality in Prognostic studies (QUIPS) risk of bias tool. Adapted from (21), PF = prognostic factor.

| Bias Assessment Domain                    | Optimal Study Description                                                                                          | Considerations                                                                                                                                                                                                                                                                                                                                                                                                                            | Overall risk of bias                                                                                                                                                                                                                  |
|-------------------------------------------|--------------------------------------------------------------------------------------------------------------------|-------------------------------------------------------------------------------------------------------------------------------------------------------------------------------------------------------------------------------------------------------------------------------------------------------------------------------------------------------------------------------------------------------------------------------------------|---------------------------------------------------------------------------------------------------------------------------------------------------------------------------------------------------------------------------------------|
| <b>Study Participation</b>                | The study sample adequately represents the population of interest                                                  | a. Adequate participation in the study by eligible individuals<br>b. Adequate description of :<br>- source population or population of interest<br>- baseline study sample<br>- sampling frame and recruitment<br>- period and place of recruitment<br>- inclusion and exclusion criteria                                                                                                                                                 | The relationship between the PF and outcome is:<br>- very likely ( <b>High bias</b> )<br>- maybe ( <b>Moderate bias</b> )<br>- unlikely ( <b>Low bias</b> )<br>to be different for participants and eligible nonparticipants.         |
| <b>Study Attrition</b>                    | The final study data presented adequately represents the initial study sample                                      | a. Adequate response rate for study participants<br>b. Description of attempts to collect information on participants who dropped out<br>c. Adequate description of participants lost to follow-up and reasons for this.<br>d. Ensure no important differences exist between those who completed the study and those who did not                                                                                                          | The relationship between the PF and outcome is<br>- very likely ( <b>High bias</b> )<br>- maybe ( <b>Moderate bias</b> )<br>- unlikely ( <b>Low bias</b> )<br>to be different for those completing the study versus those who didn't. |
| <b>Prognostic Factor (PF) Measurement</b> | The PF is measured in a similar way for all participants, in a valid manner, with adequate sample of complete data | a. A clear description of the PF is provided<br>b. Method of PF measurement is adequately valid and reliable<br>c. Continuous variables are reported or appropriate cut points are used<br>d. The method and setting of measurement of PF is the same for all study participants<br>e. Adequate proportion of the study sample has complete data for the PF variable<br>f. Appropriate methods of imputation are used for missing PF data | The measurement of the PF is<br>- very likely ( <b>High bias</b> )<br>- maybe ( <b>Moderate bias</b> )<br>- unlikely ( <b>Low bias</b> )<br>to be different for different levels of the outcome of interest.                          |
| <b>Outcome Measurement</b>                | The outcome of interest is measured in the same way for all study participants                                     | a. A clear definition of the outcome is provided<br>b. Method of outcome measurement used is adequately valid and reliable<br>c. The method and setting of outcome measurement is the same for all study participants                                                                                                                                                                                                                     | The measurement of the outcome of interest is<br>- very likely ( <b>High bias</b> )<br>- maybe ( <b>Moderate bias</b> )<br>- unlikely ( <b>Low bias</b> )<br>to be different related to the baseline level of the PF                  |
| <b>Study Confounding</b>                  | Important potential confounding factors are appropriately accounted for                                            | a. All important confounders are measured<br>b. Clear definitions of the important confounders measured are provided<br>c. Measurement of all important confounders is adequately valid and reliable<br>d. The method and setting of confounding measurement are the same for all study participants<br>e. Important potential confounders are accounted for in the study design and analysis                                             | The observed effect of the PF on the outcome is<br>- very likely ( <b>High bias</b> )<br>- maybe ( <b>Moderate bias</b> )<br>- unlikely ( <b>Low bias</b> )<br>to be distorted by an additional factor related to PF and outcome      |
| <b>Statistical Analysis and Reporting</b> | The statistical analysis is appropriate, and all primary outcomes are reported                                     | a. Sufficient presentation of data to assess the adequacy of the statistical analysis<br>b. Strategy for model building is appropriate and is based on a conceptual framework or model<br>c. The selected statistical model is adequate for the design of the study<br>d. There is no selective reporting of results                                                                                                                      | The reported results are<br>- very likely ( <b>High bias</b> )<br>- maybe ( <b>Moderate bias</b> )<br>- unlikely ( <b>Low bias</b> )<br>to be spurious or biased related to the analytical and/or reporting methods used.             |
